# Supplementary material for: Air temperature changes in SW Greenland in the second half of the 18th century
Source: Copernicus journal article supplement (doi:10.5194/cp-2023-95), 2023-12-08
Supplement: Supplementary file 1 [file cp-2023-95-supplement.pdf]

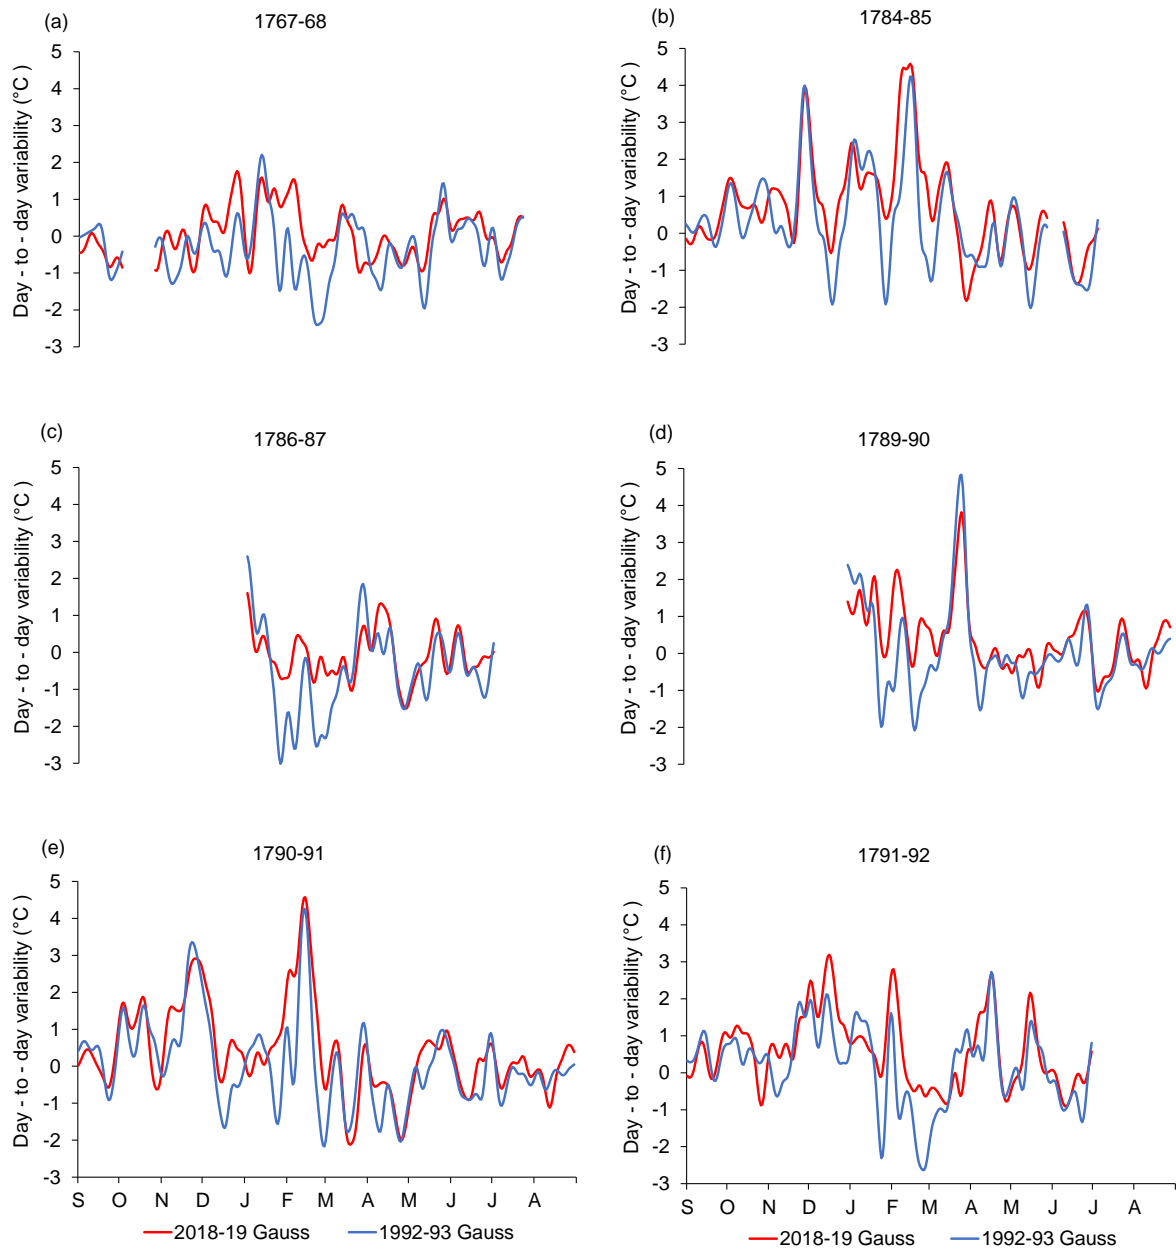

Fig. S1. Smoothed series of differences in DDTV between historical and contemporary periods for Nuuk (for present, the two years selected were 1992-93 [cold] and 2018-19 [warm]). Individual days were filtered by a Gaussian low-pass filter with a standard deviation of three days in its distribution, corresponding to a rectangular filter of about 10 days.
